# Supplementary material
Source: MDPI journal article supplement (https://www.mdpi.com/1424-2818/15/1/122)
Supplement: s1 [file s1]

**Table S1** – Records of *Astrospartus mediterraneus* for the Atlantic Ocean and the Mediterranean Sea, obtained from the scientific literature. Citations indicated with \* are included in Zibrowius, H. 1978b. Nouvelles observations de l'ophiure gorgonocéphale *Astrospartus mediterraneus* sur la côte méditerranéenne de France. Bibliographie annotée et répartition. Trav. Sci. Parc Nation. Port Cros, 4, 157-169. <http://pascal-francis.inist.fr/vibad/index.php?>

| Locality                              | Latitude | Longitude | Reference                                        |
|---------------------------------------|----------|-----------|--------------------------------------------------|
| <i>West Africa</i>                    |          |           |                                                  |
| Banc Conception, Agadir Bay           | ---      | ---       | Belloc, 1933*                                    |
| From Cap Vert, Senegal to Cap Spartel | ---      | ---       | Belloc, 1933*                                    |
| Cap Ghir                              | ---      | ---       | Stiasny, 1940                                    |
| Morocco coast                         | ---      | ---       | Mortensen, 1925*; Tortonese, 1985*               |
| Arcila Morocco                        | 35.476   | 6.0635    | Madsen, 1970*                                    |
| W Sahara coast                        | 22.000   | -17.233   | Anodon, 1977*                                    |
| Cap Blanc                             | 21.079   | -17.134   | Mortensen, 1925; Tortonese, 1965*; Anodon, 1977* |
| Senegal                               | 14.081   | -17.591   | Cadenat, 1938*                                   |
| Senegal                               | 13.716   | -17.383   | Madsen, 1970*                                    |
| Gambie                                | 13.233   | -17.508   | Cadenat, 1938*                                   |
| Sierra Leone                          | ---      | ---       | Longhurst, 1958*                                 |
| Abidjan                               | ---      | ---       | Tomazi, 1967*                                    |
| Accra                                 | ---      | ---       | Buchanan, 1958*                                  |
| Angola                                | ---      | ---       | Cherbonnier, 1962*                               |
| <i>Portugal</i>                       |          |           |                                                  |
| Olhao (Ilha da Culatra)               | ---      | ---       | Nobre, 1938*                                     |
| Lagos                                 | 37.003   | -8.703    | Boavida et al., 2016b                            |
| Lagos-Portimao                        | 37.097   | -8.660    | Boavida et al., 2016 a                           |
| Cabo São Vicente                      | 37.018   | -9.073    | Peres, 1959*                                     |
| São Vicente submarine Canyon          | 37.184   | -9.116    | Oliveira et al., 2015                            |
| Baie de Setubal                       | ---      | ---       | Greeff, 1882*                                    |
| Setubal                               | ---      | ---       | Nobre, 1903*, 1909*, 1931*, 1938*                |
| Buarcos                               | ---      | ---       | Nobre, 1909*, 1938*                              |
| Portugal                              | ---      | ---       | Tortonese, 1965*, 1985*                          |
| Matozinhos                            | ---      | ---       | Nobre, 1938*                                     |
| <i>Alboran Sea</i>                    |          |           |                                                  |

|                                               |        |        |                              |
|-----------------------------------------------|--------|--------|------------------------------|
| Parque Natural del Estrecho                   | 36.004 | -5.594 | Peláez, 2005                 |
| Malaga                                        | ---    | ---    | Rivera Gallo, 1927*          |
| Chella - Seco de los Olivos Bank              | 36.524 | -2.845 | Würtz & Rovere, 2015         |
| Seco de los Olivos Seamount                   | ---    | ---    | de la Torriente et al., 2020 |
| Almeria                                       | ---    | ---    | Rodriguez & Ibanez, 1976*    |
| <i>South-West Mediterranean Sea</i>           |        |        |                              |
| Castiglione                                   | ---    | ---    | Seurat, 1932*                |
| Castiglione Bay                               | ---    | ---    | Dieuzeide, 1950*             |
| Castiglione                                   | ---    | ---    | Tortonese, 1965*             |
| Oran Gulf                                     | 36.133 | -1.133 | Pallary, 1900*               |
| Sidi Medjdoub region                          | ---    | ---    | Benzait, 2019                |
| Chenoua                                       | ---    | ---    | Seurat, 1932*                |
| W d'Oran "Tanche"                             | 35.650 | -1.066 | Ranson, 1925b*               |
| Arzew Gulf                                    | ---    | ---    | Seurat, 1932*                |
| Tanche, Côte Est de Tunisie,<br>devant Sousse | 35.983 | -1.153 | Ranson, 1925a*; 1925b*       |
| Plane Island                                  | 37.180 | 10.328 | Hussein et al., 2019         |
| Kuriat Island                                 | 35.500 | 11.100 | Cherbonnier, 1956*           |
| Kelibia                                       | 36.834 | 11.113 | Chammem et al., 2019         |
| Tripoli                                       | 32.953 | 13.235 | Fitori et al., 2022          |
| <i>Catalan Sea</i>                            |        |        |                              |
| Blanes                                        | ---    | ---    | Aranda y Millan, 1908*       |
| Blanes Canyon                                 | 41.671 | 2.860  | Pérez-Portela et al., 2016   |
| La Fonera Submarine Canyon Head               | ---    | ---    | Lastras, 2016                |
| <i>Lion Gulf</i>                              |        |        |                              |
| Lion Gulf, several sites                      | ---    | ---    | Fabri, 2014                  |
| Parc National Port-Cros                       | ---    | ---    | Zibrowius, 1978b             |
| Gabinière Island                              | ---    | ---    | Zibrowius, 1978b             |
| Guille, Banyuls                               | ---    | ---    | Cherronnier & Guille, 1967   |
| Cap Béar, Banyuls                             | ---    | ---    | Cherronnier & Guille, 1967   |
| Le Lavandou                                   | ---    | ---    | Zibrowius, 1978a             |
| Canyon des Stoechades                         | ---    | ---    | Zibrowius, 1978a             |

|                                       |        |        |                                                                                                   |
|---------------------------------------|--------|--------|---------------------------------------------------------------------------------------------------|
| Baie de Banyuls                       | ---    | ---    | Cherronnier & Guille, 1967                                                                        |
| Cap l'Abeille                         | ---    | ---    | Laubier, 1966*; Cherronnier & Guille, 1967                                                        |
| Cap de Creus                          | 42.516 | 3.883  | Montasell Bartrés, 2020; Santin et al., 2022                                                      |
| Cap de Creus Canyon                   | 42.916 | 3.300  | Lastras et al., 2007                                                                              |
| Cap Caveau, Frioul Island             | 43.261 | 5.287  | Belloni et al., 2019                                                                              |
| Cap Morgiou                           |        |        | Zibrowius, 1978b                                                                                  |
| Marseille                             | ---    | ---    | Zibrowius, 1978b; Perseke et al., 2010; Pedel & Fabri, 2011                                       |
| Cassidaigne Canyon                    | 43.112 | 5.460  | Fabri et al., 2014                                                                                |
| <hr/> <i>Ligurian Sea</i> <hr/>       |        |        |                                                                                                   |
| NNE of Saint-Tropez Cape              | ---    | ---    | Fredj, 1964*                                                                                      |
| St Julien, St Tropez Gulf             | ---    | ---    | Harmelin et al., 1990                                                                             |
| Le Dramont                            | 43.429 | 6.907  | Giusti et al., 2019                                                                               |
| Iles des Lerins, Cannes               | ---    | ---    | Rondelet, 1554*                                                                                   |
| Nice                                  | ---    | ---    | Risso, 1826*; Fredj, 1964*; Carus, 1885*; Doderlein, 1911*; Clark, 1915*; Tortonese, 1934*, 1965* |
| Provence                              | ---    | ---    | Koehler, 1924*; Vaissière & Carpine, 1964; Vaissière & Fredj, 1964                                |
| Est d'Agay Provence                   | 43.693 | 7.261  | Carpine, 1964*                                                                                    |
| Villefrance                           | ---    | ---    | Fredj, 1964*; Tortonese, 1965*                                                                    |
| Beaulieu, Monaco                      | ---    | ---    | Tortonese, 1951, 1965*                                                                            |
| Bordighera                            | 43.770 | 7.678  | Giusti et al., 2019                                                                               |
| Sanremo                               | ---    | ---    | Chimienti, 2020                                                                                   |
| Arma di Taggia                        | 43.801 | 7.897  | Giusti et al., 2019                                                                               |
| Ligurian Sea                          | ---    | ---    | Verany, 1846*                                                                                     |
| Monterosso                            | ---    | ---    | Tortonese, 1935*, 1951*, 1965*                                                                    |
| Est & West Liguria (several stations) | ---    | ---    | Enrichetti et al., 2019                                                                           |
| <hr/> <i>Tyrrhenian Sea</i> <hr/>     |        |        |                                                                                                   |
| Tyrrhenian Sea                        | ---    | ---    | Angiolillo et al., 2015, 2021                                                                     |
| Caprera Canyon                        | 41.656 | 9.655  | Moccia et al., 2021                                                                               |
| Tavolara Canyon                       | 41.085 | 10.034 | Moccia et al., 2021                                                                               |
| Tavolara MPA                          | ---    | ---    | Canessa et al., 2022a, b;                                                                         |
| Cala Gonone Canyon                    | 41.216 | 10.131 | Moccia et al., 2021                                                                               |
| Arbatax Canyon                        | 40.103 | 10.450 | Moccia et al., 2021                                                                               |

|                                                                            |        |        |                                                                                                                                    |
|----------------------------------------------------------------------------|--------|--------|------------------------------------------------------------------------------------------------------------------------------------|
| Picocca Canyon                                                             | 40.128 | 10.183 | Moccia et al., 2021                                                                                                                |
| Simius Canyon                                                              | 39.696 | 10.480 | Moccia et al., 2021                                                                                                                |
| San Lorenzo Canyon                                                         | 40.045 | 10.531 | Moccia et al., 2021                                                                                                                |
| Orosei Canyon                                                              | 41.116 | 10.540 | Moccia et al., 2021                                                                                                                |
| Mortorio Canyon                                                            | 41.283 | 10.681 | Moccia et al., 2021                                                                                                                |
| Elba Island                                                                | 42.683 | 10.166 | Angiolillo et al., 2015                                                                                                            |
| Giglio Island                                                              | ---    | ---    | Salvati et al., 2019                                                                                                               |
| Monte Argentario                                                           | ---    | ---    | Innocenti, 2010                                                                                                                    |
| Naples                                                                     | ---    | ---    | Agassiz, 1839*; Sars, 1859*; Ludwig, 1879a*; Carus, 1885*; Doderlein, 1911*; Clark, 1915*; Koehler, 1921*, 1924*; Tortonese, 1965* |
| Salerno                                                                    | ---    | ---    | Tortonese, 1965*                                                                                                                   |
| Between Capo Vaticano and Torre di Ioppolo (Dragonara, Grotticella, Aspito | ---    | ---    | Capria, 1893*                                                                                                                      |
| St. Eufemia Gulf                                                           | 38.787 | 16.182 | Bo et al., 2012                                                                                                                    |
| Sicily                                                                     | ---    | ---    | Delle Chiaje, 1841-1844*; Koehler, 1921*, 1924*; Clark, 1915*                                                                      |
| Sicily                                                                     | ---    | ---    | Innocenti, 2010                                                                                                                    |
| Sicily                                                                     | ---    | ---    | Greenpeace, 2012                                                                                                                   |
| Messina                                                                    | ---    | ---    | Grube, 1840*, Carus, 1885*, Doderlein, 1911*                                                                                       |
| Milazzo                                                                    | ---    | ---    | Tortonese, 1965*                                                                                                                   |
| Palermo                                                                    | ---    | ---    | Grube, 1840*; Ludwig, 1879a*; Carus, 1885*; Doderlein, 1911*                                                                       |
| Marettimo Bank                                                             | 38.151 | 12.102 | Angiolillo et al., 2021                                                                                                            |
| Favignana, Egadi Islands                                                   | ---    | ---    | Delongueville & Scaillet, 2014                                                                                                     |
| <hr/> <i>Sicily Channel</i> <hr/>                                          |        |        |                                                                                                                                    |
| Sicily Channel                                                             | ---    | ---    | Consoli et al., 2018; Massi & Titone, 2017                                                                                         |
| Graham Bank                                                                | ---    | ---    | Consoli et al., 2021                                                                                                               |
| Ragusa Bank                                                                | 36.650 | 14.885 | Cattaneo-Vietti et al., 2017                                                                                                       |
| Linosa                                                                     | 35.882 | 12.854 | Romagnoli et al., 2021                                                                                                             |
| Malta                                                                      | 36.193 | 13.844 | Leonard et al., 2020                                                                                                               |
| Malta                                                                      | 36.011 | 14.070 | Leonard et al., 2020                                                                                                               |
| Malta                                                                      | 36.099 | 14.096 | Leonard et al., 2020                                                                                                               |
| Malta                                                                      | 35.512 | 14.358 | Leonard et al., 2020                                                                                                               |
| Benghisa reef, Malta                                                       | ---    | ---    | Despott, 1930*                                                                                                                     |
| Malta                                                                      | ---    | ---    | Tanti & Schembri, 2006; Terribile et al., 2016; Bialik et al., 2022                                                                |

---

|                     |     |     |                                                                  |
|---------------------|-----|-----|------------------------------------------------------------------|
| <i>Ionian Sea</i>   |     |     |                                                                  |
| Taranto             | --- | --- | Agassiz, 1839*; Doderlein, 1911*                                 |
| <i>Adriatic Sea</i> |     |     |                                                                  |
| Adriatic Sea        | --- | --- | Doderlein, 1911*; Zavodnik, 1961*; Tortonese, 1965*              |
| <i>Aegean Sea</i>   |     |     |                                                                  |
| Aegean Sea          | --- | --- | Belloc, 1948; Pancucci-Papadopoulou, 1996; Koukoras et al., 2006 |

## Supplementary references

1. Angiolillo, M., di Lorenzo, B., Farcomeni, A., Bo, M., Bavestrello, G., Santangelo, G., Cau, A., Mastascusa, V., Cau, A., Sacco, F., Canese S., 2015. Distribution and assessment of marine debris in the deep Tyrrhenian Sea (NW Mediterranean Sea, Italy). *Mar. Pollut. Bull.* **2015**, 92(1–2), 149–159. <https://doi.org/10.1016/j.marpolbul.2014.12.044>
2. Angiolillo, M., la Mesa, G., Giusti, M., Salvati, E., di Lorenzo, B., Rossi, L., Canese, S., Tunesi, L. New records of scleractinian cold-water coral (CWC) assemblages in the southern Tyrrhenian Sea (western Mediterranean Sea): Human impacts and conservation prospects. *Progr. Oceanogr.* **2021**, 197. <https://doi.org/10.1016/j.pocan.2021.102656>
3. Anodon, R. Equinodermos recogidos durante la campaña "Atlór VII" en las costas noroccidentales de África (noviembre 1975). *Resultados expediciones científicas del buque oceanográfico "Cornide de Saavedra"*. Junta Consultiva de Investigación Científica Pesquera September 1977, 6, 165-168. ISSN: 0210-2544.
4. Aranda y Millan, F. Contribución al conocimiento de los Equinodermos de España y en especial de los Holoturioideos. *Soc. Esp. Hist. Nat* 1908, 5 (5), 215-257, Madrid, p. 15-19.
5. Belloc, G. Les fonds chalutables de la côte occidentale d'Afrique (du Cap Vert au Cap Spartel). *Rev. Trav. Ofl. Pêches marit.* **1933**, 6(2), 141- 196.
6. Belloc, G. *Echinodermata*. In: *Inventory of the fishery resources of the greek water*. Appendix B. Catalogue of the resources of Greek waters, 1948, UNRRA-FAO, 74-75.
7. Belloni, B., Sartoretto, S., Cresson, P., Bouchoucha, M., Guillou, G., Lebreton, B., Ruitton, S., Harmelin, V.M. Food web structure of a Mediterranean coralligenous ecosystem. *UNEP/MAP – SPA/RAC. Proceedings of the 3rd Mediterranean Symposium on the conservation of Coralligenous & other Calcareous Bio-Concretions* (Antalya, Turkey, 15-16 January 2019). Langar, H., Ouerghi, A., edits, SPA/RAC publi., ISBN 978-9938-9574-5-7, Tunis, pp.30-35. <https://archimer.ifremer.fr/doc/00483/59511/>
8. Benzait, H., Mezali, K. Etude biométrique de l'ophiure profonde *Astrospartus mediterraneus* (Risso, 1826) (Ophiuroidea: Echinodermata) des fonds chalutables de la région de Sidi Medjdoub (Mostaganem). *J. Natl. Sci. Nat. Vie* **2019**, 41–41.
9. Bialik, O.M., Varzi, A.G., Durán, R., Le Bas, T., Gauci, A., Savini, A., Micallef, A. Mesophotic depth biogenic accumulations ("biogenic mounds") offshore the Maltese Islands, central Mediterranean Sea. *Front. Mar. Sci.* **2022**, 9. <https://doi.org/10.3389/fmars.2022.803687>
10. Bo, M., Canese, S., Spaggiari, C., Pusceddu, A., Bertolino, M., Angiolillo, M., Giusti, M., Loreto, M. F., Salvati, E., Greco, S., Bavestrello, G. Deep coral oases in the South Tyrrhenian Sea. *PLoS ONE* **2012**, 7(11), e49870. <https://doi.org/10.1371/journal.pone.0049870>
11. Boavida, J., Paulo, D., Aurelle, D., Arnaud-Haond, S., Marschal, C., Reed, J., Gonçalves, J.M.S., Serrão, E.A. A well-kept treasure at depth: Precious red coral rediscovered in Atlantic deep coral gardens (SW Portugal) after 300 Years. *PLoS ONE* **2016a**, 11(1), e0147228. <https://doi.org/10.1371/journal.pone.0147228>
12. Boavida, J., Assis, J., Reed, J., Serrão, E.A., Gonçalves, J. Comparison of small remotely operated vehicles and diver-operated video of circalittoral benthos. *Hydrobiologia* **2016b**, 766(1), 247-260.

13. Buchanan, N.B. The bottom fauna communities across the continental shelf of Accra, Ghana (Gold Coast). *Proc. Zool. Soc. Lond.* **1957**, 130 (1), 1-56. Oxford, UK: Blackwell Publishing Ltd. <https://doi.org/10.1111/j.1096-3642.1958.tb00562.x>
14. Cadenat, J. Liste des échinodermes recueillis pendant la cinquième croisière du navire de recherches Président-Théodore-Tissier (Stellerides, Ophiurides, Echinides). *Rev. Trav. Inst. Pêch. Marit.* **1938**, 11(3), 349–375. <https://archimer.ifremer.fr/doc/00000/6907/>
- 15.
16. Canessa, M., Bavestrello, G., Bo, M., Enrichetti, F., Trainito, E. Filling a Gap: A Population of *Eunicella verrucosa* (Pallas, 1766) (Anthozoa, Alcyonacea) in the Tavolara-Punta Coda Cavallo Marine Protected Area (NE Sardinia, Italy). *Diversity* **2022a**, 14(5), 405. <https://doi.org/10.3390/d14050405>
17. Canessa, M., Bavestrello, G., Guidetti, P., Navone, A., Trainito, E. Marine rocky reef assemblages and lithological properties of substrates are connected at different ecological levels. *Europ. Zool. J.* **2022b**, 89(1), 813-826. <https://doi.org/10.1080/24750263.2022.2095045>
18. Capria, A. Appunti anatomici sull' *Astrophyton arborescens*, Müller et Troschel. *Riv. Ital. Sci. Nat.* **1893**, 13, 115–118
19. Carus, J.V. Prodrum faunae Mediterraneae. Vol. Coelenterata, Echinodermata, Vermes, Arthropoda. Stuttgart 1885, p. 282.
20. Cattaneo-Vietti, R., Albertelli, G., Aliani, S., Bava, S., Bavestrello, G., Cecchi, L.B. et al. The Ligurian Sea: present status, problems and perspectives. *Chemistry and Ecology* **2010**, 26(S1), 319-340. <https://doi.org/10.1080/02757541003689845>
21. Chammem, H., Souissi, J.B., Pérez-Ruzafa, A. Checklist with first records for the Echinoderms of northern Tunisia (central Mediterranean Sea). *Sci. Mar.* **2019**, 83(3), 277-288. ISSN: 1886-8134. Permalink: <http://digital.casalini.it/4574321>
22. Cherbonner, G. Les Echinodermes de Tunisie. *Stat. océanogr. Salammbô Bull.* **1956**, 53, 1-23.
23. Cherbonner, G. Ophiurides. Rés. sci. Exped. océanogr. Belge Eaur. côst. air. Atl. Sud **1962**, 3(8), 1-24, p. 1-7.
24. Cherronnier, G., Guille, A. *Complément à la faune des échinodermes de la mer de Banyuls*. Vie et Milieu, Observatoire Océanologique - Laboratoire Arago, 1967, pp.317-330. fhal-02951584. <https://hal.sorbonne-universite.fr/hal-02951584>
25. Chimienti, G. Vulnerable forests of the pink sea fan *Eunicella verrucosa* in the Mediterranean Sea. *Diversity* **2020**, 12(5), 176.
26. Clark, H.L. Catalogue of recent Ophiurans. Based on the collection of the Museum of Comparative Zoology. *Mem. Mus. comp. Zool.* **1915**, 25 (4), 163-376, p. 1-20.
27. Consoli, P., Andaloro, F., Altobelli, C., Battaglia, P., Campagnuolo, S., Canese, S., Castriota, L., Cillari, T., Falautano, M., Pedà, C., Perzia, P., Sinopoli, M., Vivona, P., Scotti, G., Esposito, V., Galani, F., Romeo, T. Marine litter in an EBSA (Ecologically or Biologically Significant Area) of the central Mediterranean Sea: Abundance, composition, impact on benthic species and basis for monitoring entanglement. *Environ. Poll.* **2018**, 236, 405-415. <https://doi.org/10.1016/j.envpol.2018.01.097>
28. Consoli, P., Altobelli, C., Perzia, P., Bo, M., Rosso, A., Alongi, G., Serio, D., Canese, S., Romeo, T., Andaloro, F. Species and habitats of conservation interest in the Ecologically and Biologically Significant Area of the Strait of Sicily: A contribution towards the creation of a Specially Protected Area of Mediterranean Importance. *Mediterr. Mar. Sci.* **2021**, 22(2), 297–316. <https://doi.org/10.12681/mms.25125>
29. Delle Chiaje, S. Descrizione e notomia degli animali invertebrata della Sicilia citeriore osservati vivi negli anni 1822-1830. Napoli, 1841, vol. 1 (1841), atlas (1844).
30. Delongueville, C., Scaillet, R. Inventaire des mollusques présents dans le tube digestif d'un *Spatangus purpureus* (O.F. Müller, 1776) à Favignana (Iles Egades-Sicile-Italie). *Novapex. Trimestriel de La Société Belge de Malacologie* **2014**, 15(1), 3–7. urn:oclc:record:1049971846
31. Dieuzide, R. La faune du fond chalutable de la baie de Castiglione. Poissons. *Bull. Trav. Stat. Aquicult. Pêche Castiglione* 1950 (n.s.)2, 11-86. CRID: 1570854175241642112
32. Doderlein, L. Über japanische und andere Euryalae. DOFLEIN F. Beiträge zur Naturgeschichte Ostasiens. *Abhandl. bayer. Akad. Wiss. math. phys.* **1911**, Kl., Suppl. 2(5), 1-123, p. 1-9.
33. Enrichetti F., Dominguez-Carrió C., Toma M., Bavestrello G., Betti F., Canese S., Bo, M. Megabenthic communities of the Ligurian deep continental shelf and shelf break (NW Mediterranean Sea). *PLoS ONE* **2019**, 14(10), e0223949. <https://doi.org/10.1371/journal.pone.0223949>
34. Fabri, M. C., Pedel, L., Beuck, L., Galgani, F., Hebbeln, D., Freiwald, A. Megafauna of vulnerable marine ecosystems in French Mediterranean submarine canyons: Spatial distribution and anthropogenic impacts. *Deep Sea Res. Part II.* **2014**, 104, 184–207. <https://doi.org/10.1016/j.DSR2.2013.06.016>
35. Fitori, A., Fitori, A. el, Badreddine, A., Aguilar, R. First Record of the Basket Star *Astrospartus Mediterraneus* (Risso, 1826) (Echinodermata: Ophiuroidea) in the Libyan Waters. *Int. J. Agric. Environ. Sci.* **2022**, 9(1), 49–50. <https://doi.org/10.14445/23942568/ijaesv9i1p109>

36. Fredj, G. Contribution à l'étude bionomique de la Méditerranée occidentale (côte du Var et des Alpes-Maritimes — côte occidentale de Corse) Fascicule 2: la région de Saint-Tropez: du Cap Taillat au Cap Saint-Tropez (région A 1). *Bull. Inst. océanogr. Monaco* **1964**, 63(1311 a), 1-55.
37. Giusti, M., Canese, S., Fourt, M., Bo, M., Innocenti, C., Goujard, A., Daniel, B., Angeletti, L., Taviani, M., Tunesi, L. Coral forests and Derelict Fishing Gears in submarine canyon systems of the Ligurian Sea. *Prog. Oceanogr.* **2019**, 178, 102186. <https://doi.org/10.1016/j.pcean.2019.102186>
38. Greeff, R. Echinodermen, beobachtet auf einer Reise nach der Guinea Insel São Thomê. *Zool. Anzeiger* **1882**, 5, 114-120, 135-139, 156-159.
39. Greenpeace. I Tesori sommersi del Canale di Sicilia. No trivelle tour 2012, 27 pp.
40. Grube, A.E. Actinien, Echinodermen und Würmer des Adriatischen und Mittelmeeres nach eignen Sammlungen beschrieben. Königsberg, J. H. *Bon* **1840**, pp. 92, p. 1.
41. Harmelin, J. G., Zibrowius, H., Arnoux, A., Romana, L. Evaluation de l'état des peuplements Benthiques du haut-fond St Julien (Région de St Tropez) campagnes Cyana de mars et Juin 1990. <https://archimer.ifremer.fr/doc/00132/24319/>
42. Hussein, K.B., Bensahla Talet, L. A preliminary inventory of biodiversity and benthic habitats of "Plane" Island (Paloma) in Oran Bay, north western Algeria (western Mediterranean). *J. Black Sea/Mediter. Environ.* **2019**, 25(1), 49-72. <http://hdl.handle.net/1834/40685>
43. Koehler, R. *Faune de France* 1. Paris, 1921, Paul LeChevalier. 210 pp.
44. Koehler, R. *Les Echinodermes des mers d'Europe*. Tome 1. 1924, Paris Doin, 362 pp., p. 9.
45. Koukouras, A., Sinis, A.I., Bobori, D., Kazantzidis, S., Kitsos, M.S. The echinoderm (Deuterostomia) fauna of the Aegean Sea, and comparison with those of the neighbouring seas. *J. Biol. Res.* **2007**, 7, 67-92.
46. Innocenti, G. Collections of the natural history museum zoological section «La Specola» of the university of Florence XXVIII. phylum echinodermata, class Ophiuroidea. *Atti Soc. Toscana Sci. Nat., Mem. Ser. B.* **2010**, 117, 7-21. <https://doi.org/10.2424/ASTSN.M.2010.11>
47. Lastras, G., Canals, M., Urgeles, R., Amblas, D., Ivanov, M., Droz, L., Dennielou, B., Fabrés, J., Schoolmeester, T., Akhmetzhanov, A., Orange, D., García-García, A. A walk down the Cap de Creus canyon, Northwestern Mediterranean Sea: Recent processes inferred from morphology and sediment bedforms. *Mar. Geol.* **2007**, 246(2-4), 176-192. <https://doi.org/10.1016/J.margeo.2007.09.002>
48. Lastras, G., Canals, M., Ballesteros, E., Gili, J.-M., Sanchez-Vidal, A. Cold-Water Corals and Anthropogenic Impacts in La Fonera Submarine Canyon Head, Northwestern Mediterranean Sea. *PLoS ONE* **2016**, 11(5), e0155729. <https://doi.org/10.1371/journal.pone.0155729>
49. Laubier, L. Le coralligène des Albères. Monographie biocénotique. *Ann. Inst. océanogr. Paris* **1966**, 43(2), 137-316.
50. Leonard, C., Evans, J., Knittweis, L., Aguilar, R., Alvarez, H., Borg, J.A., Garcia, S., Schembri, P.J. Diversity, distribution, and habitat associations of deep-water echinoderms in the Central Mediterranean. *Mar. Biodivers.* **2020**, 50(5), 69. <https://doi.org/10.1007/s12526-020-01095-3>
51. Longhurst, A.R. *An ecological survey of the west African marine benthos*. London, Colonial Office, Fishery Publ. **1958**, 11, 102.
52. Ludwig, H. Die Echinodermen des Mittelmeeres. Prodromus einer monographischen Bearbeitung derselben. *Mitth. zool. Stat. Neapel* **1879a**, 3, 523- 580.
53. Madsen, F.J. West African Ophiuroids. *Atlantide Rep.* **1970**, 11, 151-243.
54. Massi, D., Titone, A. Composizione dello "sporco"(macrobenthos non commerciale) della pesca a strascico. Campagna MEDITS 2016-Stretto di Sicilia. IAMC - CNR Sede di Mazara del Vallo, 2017.
55. Moccia, D., Cau, A., Bramanti, L., Carugati, L., Canese, S., Follesa, M.C., Cannas, R. Spatial distribution and habitat characterization of marine animal forest assemblages along nine submarine canyons of Eastern Sardinia (central Mediterranean Sea). *Deep Sea Research Part I: Oceanographic Research Papers* **2021**, 167, 103422. <https://doi.org/10.1016/j.dsr.2020.103422>
56. Mortensen, T. Echinodermes du Maroc et de Mauritanie. *Bull. Soc. Sci. nat. Maroc* **1925**, 5, 178-187, p. 32-34.
57. Montasell Bartrés, M. *Astrosparthus mediterraneus* (Echinodermata: Ophiuroidea) in the Cap de Creus marine area: Ecological characterization of an emblematic species. Universitat de Vic - Universitat Central de Catalunya. Facultat de Ciències i Tecnologia, Bachelor Thesis 2020. <http://hdl.handle.net/10854/6142>
58. Nobre, A. Echinodermes de Portugal. *Annaes Acad. Polytechn. Porto* **1903**, 4, 136-165.
59. Nobre, A. Echinodermes de Portugal. *Annaes Acad. polytechn. Porto* **1909** 4, 136-165.
60. Nobre, A. *Echinodermes de Portugal*. Porto **1931**, 176 p., p. 14.



61. Nobre, A. Echinodermes de Portugal. 2nd edition. Fauna marinha de Portugal, Porto **1938**, 5, 1-215, p. 1-72.
62. Oliveira, F., Monteiro, P., Bentes, L., Henriques, N.S., Aguilar, R., Gonçalves, J.M.S. Marine litter in the upper São Vicente submarine canyon (SW Portugal): Abundance, distribution, composition and fauna interactions. *Mar. Pollut. Bull.* **2015**, 97(1–2), 401–407. <https://doi.org/10.1016/j.marpolbul.2015.05.060>
63. Pallary, P. Coquilles marines du littoral du département d'Oran. *J. Conchyl.*, Paris, 1900, 48, 211-432, p. 6-8.
64. Pancucci-Papadopolou, M.A. *The Echinodermata of Greece*. In: Fauna Graeciae, Athens NCMR, 6, 1996.
65. Pedel, L., Fabri, M.C. Description et cartographie des biocénoses benthiques rencontrées au cours de la campagne MEDSEACAN (Aamp/Comex). RST. ODE/LER-PAC/11-11. <https://archimer.ifremer.fr/doc/00044/15513/>
66. Peláez, Á.T.H. El parque natural del Estrecho: génesis normativa y perspectivas medioambientales. *Almoraima: revista de estudios campogibraltareños* **2005**, (31), 287-304.
67. Peres, J.M. Résultats scientifiques de la campagne de N.R.P. Faial dans les eaux côtières du Portugal, 1957, No. 1. Aperçu bionomique sur les communautés benthiques des côtes sud du Portugal. Lisboa, Gabinete de Estudos das Pescas, 1959, 35 pp.
68. Pérez-Portela, R., Cerro-Gálvez, E., Taboada, S., Tidu, C., Campillo-Campbell, C., Mora, J., Riesgo, A. Lonely populations in the deep: genetic structure of red gorgonians at the heads of submarine canyons in the north-western Mediterranean Sea. *Coral Reefs* **2016**, 35(3), 1013-1026. <https://doi.org/10.1007/s00338-016-1431-2>
69. Perseke, M., Bernhard, D., Fritzsche, G., Brümmer, F., Stadler, P.F., Schlegel, M. Mitochondrial genome evolution in Ophiuroidea, Echinoidea, and Holothuroidea: insights in phylogenetic relationships of Echinodermata. *Mol. Phylogenet. Evol.* **2010**, 56(1), 201-211. <https://doi.org/10.1016/j.ympev.2010.01.035>
70. Ranson, G. Appendice N 2. Liste des Echinodermes recueillis au cours de la croisière de la « Tanche » en 1924 sur les côtes d'Algérie, pp. 53-54, În LE DANOIS E., 1925 b. - Recherches sur les fonds chalu-tables des côtes d'Algérie (croisière de la « Tanche » en 1924). *Off. sci. téchn. Pêches marit., Mém.* 3,1-55, 1 carte.
71. Ranson, G. Appendice N 2. Liste des Echinodermes recueillis au cours de la croisière de la « Tanche » en 1924, sur les côtes de Tunisie, pp. 53-54. LE DANOIS E., 1925 a. — Recherches sur les fonds chalu-tables de Tunisie. *Off. sci. téchn. Pêches marit., Mém.* 3, 1- 56, 1 carte.
72. Risso, A. Histoire naturelle des principales productions de l'Europe méridionale et particulièrement de celles des environs de Nice et des Alpes Maritimes. 3 Paris, Strasbourg 1826, Chez F.-G. Levrault libraire. <https://doi.org/10.5962/bhl.title.58984>
73. Rivera Gallo, V. Contribución al conocimiento de los Ofiúridos de España. Madrid, Ministerio de la Marina, Dirección general de Pesca, Notas y Resúmenes **1927**, Ser. 2, N. 13.
74. Rodriguez, J., Ibanez, M. Contribución al conocimiento de los equinodermos (Asteroidea, Ophiuroidea, Echinoidea) de la bahía de Almería (España). *Inves. Pesqu. Barcelona* **1976**, 40(2), 455-462. <http://pascal-francis.inist.fr/vibad/index.php?action=getRecordDetail&idt=PASCAL7750166675>
75. Romagnoli, B., Grasselli, F., Costantini, F., Abbiati, M., Romagnoli, C., Innangi, S., Di Martino, G., Tonielli, R. Evaluating the distribution of priority benthic habitats through a remotely operated vehicle to support conservation measures off Linosa Island (Sicily Channel, Mediterranean Sea). *Aquat. Conserv.: Mar. Fresh. Eco.* **2021**, 31(7), 1686-1699. <https://doi.org/10.1002/aqc.3554>
76. Rondelet, G. Libri de piscibus marinis, in quibus verae piscium effigies expressae sunt. Lyon 1554, XIII -I- pp. 606.
77. Salvati, E., Angiolillo, A., Canese, S., Giusti, M., Tunesi, I. Presence of two *Paramuricea macrospina* dense populations in the Tyrrhenian sea (Mediterranean Sea). UNEP/MAP – SPA/RAC, 2019. *Proceedings of the 3rd Mediterranean Symposium on the conservation of Coralligenous & other Calcareous Bio-Concretions* (Antalya, Turkey, 15-16 January 2019). Langar, H., Ouerghi, A., edits, SPA/RAC publi., Tunis, p. 135. ISBN 978-9938-9574-5-72018, p. 115.
78. Santin, A., Grinyó, J., Ambroso, S., Baena, P., Biel-Cabanelas, M., Corbera, G., Salazar, J., Montseny, M., Gili, J.-M. Fishermen and scientists: synergies for the exploration, conservation and sustainability of the marine environment. In M. V. Martínez de Albéniz (Ed.), *The ocean we want: inclusive and transformative ocean science*. Institut de Ciències del Mar, 2022, CSIC, pp. 77–79. <https://doi.org/10.20350/digitalCSIC/14070>
79. Sars, M. Bidrag til kundskaben om Middelhavets littoral-fauna. Reise- bemærkninger Ira Italien. *Nyt Mag. Naturvid.*, Oslo **1859**, 10 (1), 1-99, p. 1-2
80. Seurat, L.G. Présence de l'*Astrospartus arborescens* (Rondelet) dans la baie de Castiglione. *Bull. Trav. Stt. Aquicult. Pêche Castiglione* 1932, 2, 135- 142.
81. Stiasny, G. Gorgonaires du Maroc. Collection rassemblée par Robert Ph. Dollfus. *Bull. Soc. Sci. nat. Maroc* **1940**, 19 (2), 119-149, p. 3-8.
82. Tanti, C.M., Schembri, P.J. A synthesis of the echinoderm fauna of the Maltese islands. *J. Mar. Biol. Ass. UK* **2006**, 86(1), 163-165. <https://doi.org/10.1017/S0025315406012987>
83. Terribile, K., Evans, J., Knittweis, L., Schembri, P.J. Maximizing MEDITS: Using data collected from trawl surveys to characterize the benthic and demersal assemblages of the circalittoral and deeper waters around the Maltese Islands (Central Mediterranean). *Reg. Stud. Mar. Sci.* **2016**, 3, 163–175. <https://doi.org/10.1016/j.rsma.2015.07.006>



84. Tomazi, L.R. Ophiuroidea de la Côte d'Ivoire. *Bull. I.F.A.N.*, Dakar 1967, 29(2 A), 521-585
85. de la Torriente, A., Aguilar, R., González-Irusta, J.M., Blanco, M., Serrano, A. Habitat forming species explain taxonomic and functional diversities in a Mediterranean seamount. *Ecol. Ind.* **2020**, 118, 106747. <https://doi.org/10.1016/j.ecolind.2020.106747>
86. Tortonese, E. Gli Echinodermi del Museo di Torino. II. Ofiuroidi. *Boll. Mus. Zool. Anat. comp. Univ. Torino* 1934, 44 (45), 13-65, pl. 1-8.
87. Tortonese, E. Contributo alla conoscenza degli Echinodermi mediterranei. *Ann. Mus. civ. Storia nat. Genova* 1935, 57, 219-272.
88. Tortonese, E. Gli Echinodermi del Mar Ligure e delle zone vicine. *Atti Acc. ad. Ligure Sci. Lett.* 1951, 8, 165-242, p. 1.
89. Tortonese, E. *Echinodermata. Fauna d'Italia Vol. 6*. Bologna, 1965, Ediz. Calderini, XVI -i- p. 422.
90. Tortonese, E. Distribution and ecology of endemic elements in the Mediterranean fauna (fishes and echinoderms). *Mediterranean marine ecosystems*. Springer 1985, Boston, MA 57-83.
91. Vaissière, R., Carpine, C. Contributions à l'étude bionomique de la Méditerranée occidentale (Côte du Var et des Alpes maritimes-côte occidentale de Corse). I— Généralités. *Bull. Inst. Oceanogr.* **1964**, 63(1310), 1-12.
92. Vaissière R, Fredj G. Etude photographique préliminaire de l'étage bathyal dans la région de Saint-Tropez - Fascicule 5. *Bull. Inst. Océanogr. Monaco* **1964**, 64(1323), 1-70.
93. Zavodni, K.D. List of Adriatic Echinoderms and their bathymetrical distribution. *Biološki Vestnik* **1961**, 8, 49-55.
94. Würtz, M., Rovere, M. *Atlas of the Mediterranean seamounts and seamount-like structures*. Gland, Switzerland and Málaga, 2015, Spain: IUCN, p. 276.
95. Zibrowius, H. Observations biologiques au large du Lavandou (côte méditerranéenne de France) à l'aide du sous-marin Griffon de la marine nationale. *Trav. Sci. Parc Nation. Port Cros* **1978a**, 4, 171-176.
96. Zibrowius, H. Nouvelles observations de l'ophiure gorgonocéphale *Astrospartus mediterraneus* sur la côte méditerranéenne de France. Bibliographie annotée et répartition. *Trav. Sci. Parc Nat. Port-Cros* **1978b**, 4, 3. <http://pascal-francis.inist.fr/vibad/index.php?action=getRecordDetail&idt=PASCALZOO LINEINRA8050039209>
